# Supplementary material for: Ligand field molecular dynamics simulation of Pt(II)-phenanthroline binding to N-terminal fragment of amyloid-β peptide
Source: PubMed Central journal article supplement (PMC5839559; doi:10.1371/journal.pone.0193668), 2018-03-06
Supplement: pone.0193668.s006.pdf [file pone.0193668.s006.pdf]

**Table S1: Merz-Kollman partial charges for Pt(phen)(imid)<sub>2</sub>**

| <b>Metal</b>     |               | <b>His</b>       |               | <b>Phen</b>      |               |
|------------------|---------------|------------------|---------------|------------------|---------------|
| <i>Atom name</i> | <i>Charge</i> | <i>Atom name</i> | <i>Charge</i> | <i>Atom name</i> | <i>Charge</i> |
| Pt               | 0.560         | N $\epsilon$     | 0.324         | N1               | 0.025         |
|                  |               | C $\epsilon$     | -0.140        | C2               | 0.001         |
|                  |               | N $\delta$       | -0.350        | C3               | 0.134         |
|                  |               | C $\delta$       | -0.448        | C4               | -0.262        |
|                  |               | C $\gamma$       | 0.293         | C5               | -0.017        |
|                  |               | C $\beta$        | -0.423        | C6               | 0.077         |
|                  |               | H $\epsilon$     | 0.248         | C7               | -0.219        |
|                  |               | H $\delta$ N     | 0.425         | H2               | 0.190         |
|                  |               | H $\delta$ C     | 0.267         | H4               | 0.217         |
|                  |               | H $\beta$ 1      | 0.160         | H5               | 0.192         |
|                  |               | H $\beta$ 2      | 0.162         | H7               | 0.216         |
