# Supplementary material for: Ligand field molecular dynamics simulation of Pt(II)-phenanthroline binding to N-terminal fragment of amyloid-β peptide
Source: PubMed Central journal article supplement (PMC5839559; doi:10.1371/journal.pone.0193668), 2018-03-06
Supplement: pone.0193668.s007.pdf [file pone.0193668.s007.pdf]

**Table S2: RMSF Details from individual simulations (Å)**

| Residue | A    | B    | C    | D    | E    | Mean | SD   |
|---------|------|------|------|------|------|------|------|
| 1       | 0.33 | 0.35 | 0.32 | 0.28 | 0.35 | 0.33 | 0.03 |
| 2       | 0.47 | 0.57 | 0.48 | 0.36 | 0.52 | 0.48 | 0.07 |
| 3       | 0.40 | 0.44 | 0.36 | 0.40 | 0.31 | 0.38 | 0.05 |
| 4       | 0.61 | 0.64 | 0.75 | 0.58 | 0.54 | 0.63 | 0.08 |
| 5       | 0.29 | 0.39 | 0.37 | 0.34 | 0.38 | 0.35 | 0.04 |
| 6       | 0.55 | 0.59 | 0.40 | 0.56 | 0.44 | 0.51 | 0.09 |
| 7       | 0.36 | 0.37 | 0.36 | 0.34 | 0.37 | 0.36 | 0.01 |
| 8       | 0.28 | 0.42 | 0.39 | 0.51 | 0.37 | 0.39 | 0.08 |
| 9       | 0.29 | 0.33 | 0.38 | 0.49 | 0.46 | 0.39 | 0.08 |
| 10      | 0.50 | 0.55 | 0.64 | 0.40 | 0.57 | 0.53 | 0.09 |
| 11      | 0.36 | 0.37 | 0.30 | 0.33 | 0.33 | 0.34 | 0.03 |
| 12      | 0.57 | 0.46 | 0.42 | 0.47 | 0.61 | 0.51 | 0.08 |
| 13      | 0.57 | 0.54 | 0.33 | 0.38 | 0.49 | 0.46 | 0.10 |
| 14      | 0.35 | 0.32 | 0.42 | 0.44 | 0.43 | 0.39 | 0.05 |
| 15      | 0.35 | 0.42 | 0.42 | 0.34 | 0.43 | 0.39 | 0.04 |
| 16      | 0.41 | 0.42 | 0.33 | 0.44 | 0.57 | 0.43 | 0.09 |
|         |      |      |      |      |      |      |      |
|         | F    | G    | H    | I    | J    |      |      |
| 1       | 0.64 | 0.34 | 0.34 | 0.34 | 0.53 | 0.44 | 0.14 |
| 2       | 0.64 | 0.49 | 0.51 | 0.49 | 0.61 | 0.55 | 0.07 |
| 3       | 0.42 | 0.34 | 0.31 | 0.34 | 0.44 | 0.37 | 0.05 |
| 4       | 0.37 | 0.72 | 0.47 | 0.72 | 0.62 | 0.58 | 0.16 |
| 5       | 0.51 | 0.32 | 0.53 | 0.32 | 0.46 | 0.43 | 0.10 |
| 6       | 0.33 | 0.35 | 0.30 | 0.35 | 0.37 | 0.34 | 0.03 |
| 7       | 0.34 | 0.35 | 0.42 | 0.35 | 0.35 | 0.36 | 0.03 |
| 8       | 0.40 | 0.45 | 0.50 | 0.45 | 0.51 | 0.46 | 0.05 |
| 9       | 0.38 | 0.36 | 0.41 | 0.35 | 0.49 | 0.40 | 0.05 |
| 10      | 0.29 | 0.95 | 0.38 | 0.95 | 0.76 | 0.67 | 0.31 |
| 11      | 0.42 | 0.35 | 0.37 | 0.35 | 0.38 | 0.37 | 0.03 |
| 12      | 0.44 | 0.76 | 0.52 | 0.76 | 0.59 | 0.61 | 0.15 |
| 13      | 0.39 | 0.59 | 0.38 | 0.59 | 0.45 | 0.48 | 0.11 |
| 14      | 0.28 | 0.29 | 0.28 | 0.29 | 0.33 | 0.30 | 0.02 |
| 15      | 0.40 | 0.58 | 0.63 | 0.58 | 0.54 | 0.55 | 0.09 |
| 16      | 0.50 | 0.39 | 0.50 | 0.39 | 0.61 | 0.48 | 0.09 |
