# Supplementary material for: Ligand field molecular dynamics simulation of Pt(II)-phenanthroline binding to N-terminal fragment of amyloid-β peptide
Source: PubMed Central journal article supplement (PMC5839559; doi:10.1371/journal.pone.0193668), 2018-03-06
Supplement: pone.0193668.s008.pdf [file pone.0193668.s008.pdf]

**Table S3: Percentage of secondary structures for simulations A – J.**

|                  |     | Turn  | $\beta$ -sheet | Bridge | $\alpha$ -helix | $3_{10}$ -helix | $\pi$ -helix | Coil  |
|------------------|-----|-------|----------------|--------|-----------------|-----------------|--------------|-------|
| A $\beta$ 16     | (A) | 73.52 | 0.00           | 0.07   | 0.00            | 4.69            | 0.00         | 21.72 |
|                  | (B) | 67.77 | 0.00           | 2.57   | 0.00            | 0.73            | 0.03         | 28.90 |
|                  | (C) | 77.21 | 0.00           | 0.00   | 0.00            | 0.00            | 0.00         | 22.79 |
|                  | (D) | 66.20 | 0.00           | 0.00   | 0.00            | 0.00            | 0.00         | 33.80 |
|                  | (E) | 58.09 | 0.00           | 0.00   | 0.00            | 0.00            | 0.00         | 41.91 |
| Pt(A $\beta$ 16) | (F) | 41.62 | 0.00           | 0.00   | 0.00            | 16.35           | 0.00         | 42.03 |
|                  | (G) | 82.66 | 0.00           | 0.00   | 0.00            | 0.00            | 0.00         | 17.34 |
|                  | (H) | 55.90 | 0.00           | 0.00   | 0.00            | 0.00            | 0.00         | 44.10 |
|                  | (I) | 82.68 | 0.00           | 0.00   | 0.00            | 0.00            | 0.00         | 17.32 |
|                  | (J) | 53.27 | 0.00           | 0.00   | 0.00            | 0.00            | 0.00         | 46.73 |
